# Supplementary material
Source: PubMed Central journal article supplement (PMC10021023)
Supplement: NIHMS1698999-supplement-Supplementary_Material.pdf [file NIHMS1698999-supplement-Supplementary_Material.pdf]

## **Appendix Material**

Deng W, Yin S, McMullin D, et al. Residual Shunt post Patent Foramen Ovale Closure and Long-term Stroke Recurrence: A Prospective Cohort Study

## **Appendix Methods**

### **Transthoracic echocardiogram bubble study**

Transthoracic echocardiogram (TTE) with agitated saline microbubbles was performed under a standardized protocol to evaluate residual shunt at rest and during Valsalva maneuver per American Society of Echocardiography guidelines. 9 mL of sterile saline and 1 mL of room air are agitated and injected as an intravenous bolus with cannula no less than 20 gauge. To ensure the effectiveness of Valsalva maneuver, the sonographer explained the Valsalva maneuver to the patient and had the patient do practice maneuvers prior to saline injection, which allowed the sonographer to be aware of, and adjust for, changes in views during the Valsalva maneuver. Effectiveness of Valsalva maneuver was determined by the visible increase in saline contrast on the right side of the heart with leftward bowing of the interatrial septum upon release of Valsalva. If this did not occur, the maneuver was reperformed until there was adequate opacification of the right atrium and leftward bowing of the septum. If the suspicion of residual shunt persisted despite negative echocardiographic studies, saline contrast injections were repeated to ensure that the negative results were true.

## Appendix Figure 1.

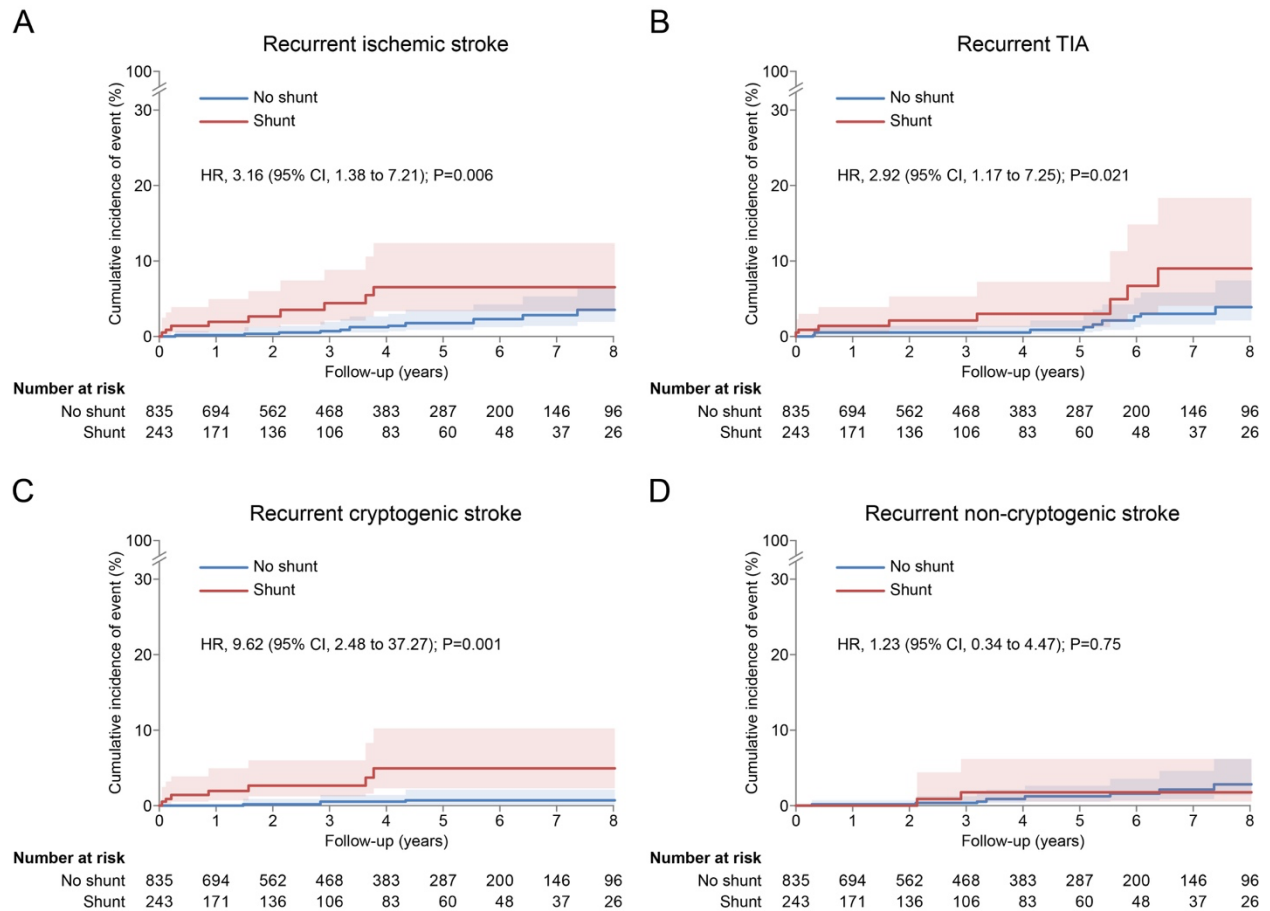

**Appendix Figure 1. Secondary outcome in patients with and without residual shunt post percutaneous PFO closure.** Cumulative incidence of recurrent ischemic stroke (**A**), recurrent TIA (**B**), recurrent cryptogenic stroke (**C**) and recurrent non-cryptogenic stroke (**D**) in patients with and without shunt post closure. TIA = transient ischemic attack; HR = hazard ratio; CI = confidence interval.

**Appendix Figure 2.**

### Recurrent ischemic stroke and TIA

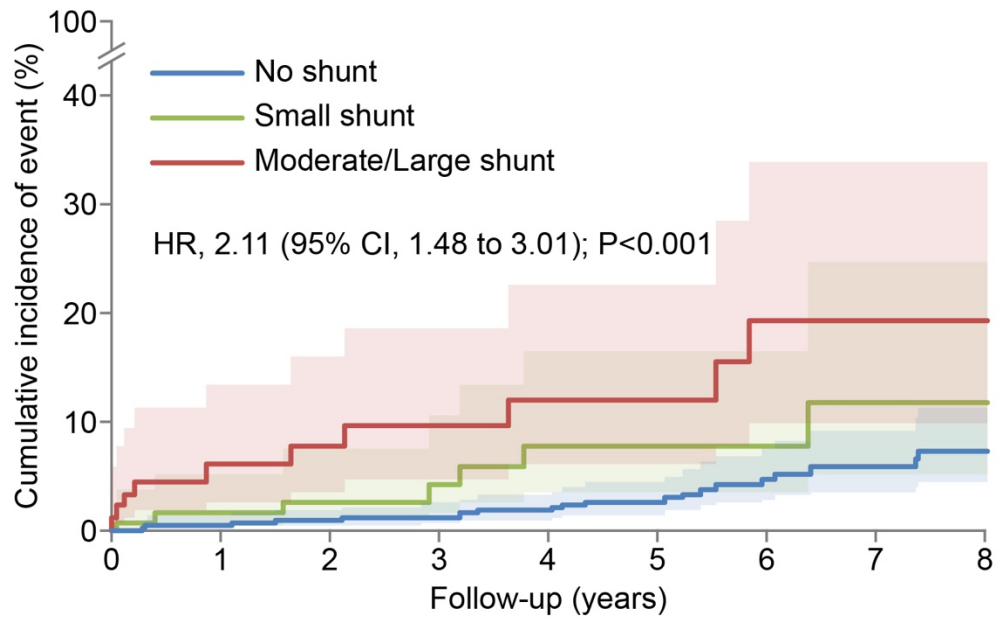

| <b>Number at risk</b> |     |     |     |     |     |     |     |     |    |
|-----------------------|-----|-----|-----|-----|-----|-----|-----|-----|----|
| No shunt              | 835 | 694 | 562 | 468 | 383 | 287 | 200 | 146 | 96 |
| Small shunt           | 150 | 109 | 82  | 64  | 49  | 32  | 26  | 20  | 16 |
| Moderate/large shunt  | 93  | 62  | 54  | 42  | 34  | 28  | 22  | 17  | 10 |

**Appendix Figure 2. Primary outcome (composite stroke/TIA) by shunt size.**

TIA = transient ischemic attack; HR = hazard ratio; CI = confidence interval.

### Appendix Figure 3.

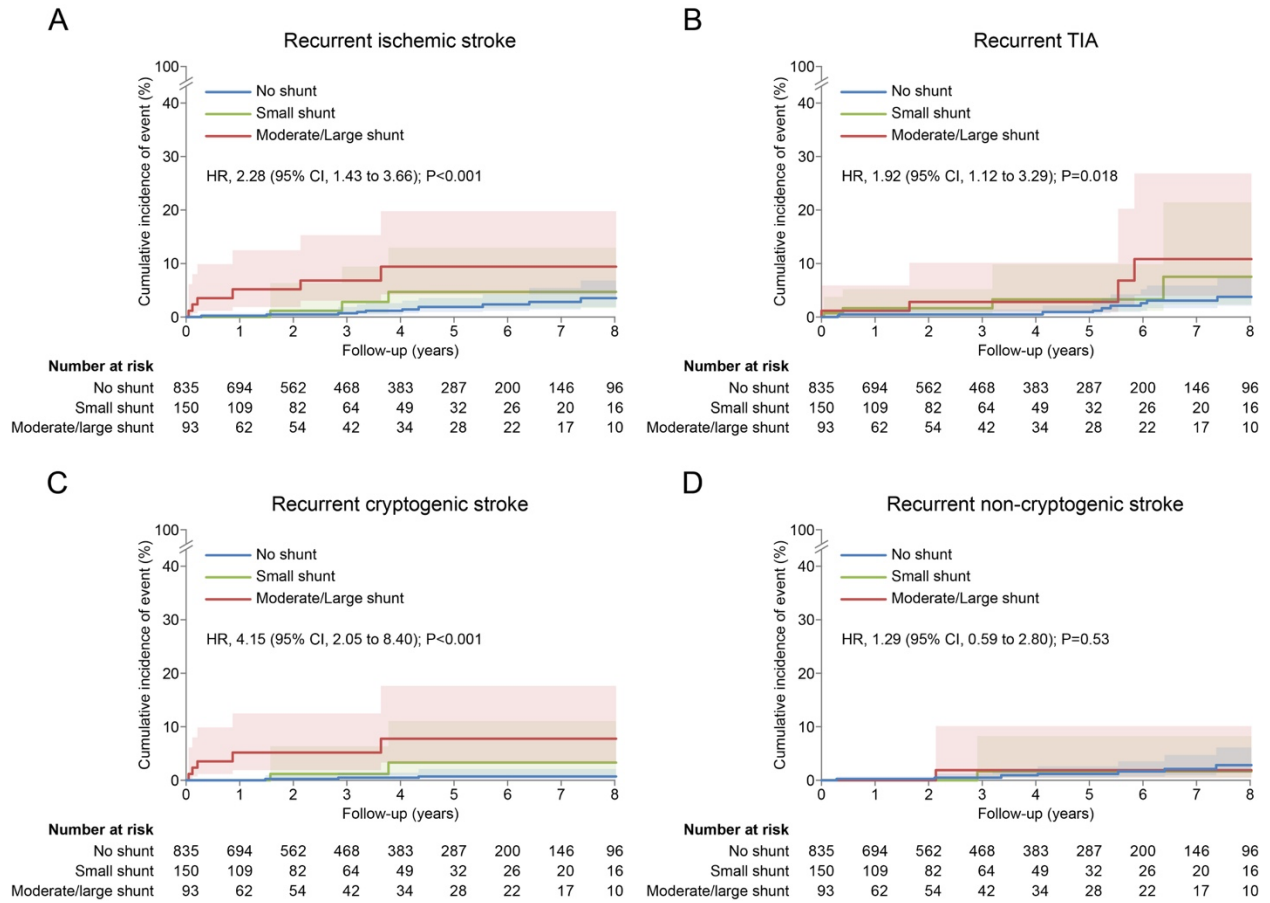

**Appendix Figure 3. Secondary outcome by shunt size.** Cumulative incidence of recurrent ischemic stroke (A), recurrent TIA (B), recurrent cryptogenic stroke (C) and recurrent non-cryptogenic stroke (D) in patients with different shunt sizes. TIA = transient ischemic attack; HR = hazard ratio; CI = confidence interval.

**Appendix Table 1.** Hypercoagulable state and device usage in patients with and without residual shunt.

| <b>Characteristic</b>        | <b>Total<br/>(n=1078)</b> | <b>No shunt<br/>(n=835)</b> | <b>Shunt<br/>(n=243)</b> |
|------------------------------|---------------------------|-----------------------------|--------------------------|
| Hypercoagulable state, n (%) |                           |                             |                          |
| Prothrombin gene mutation    | 28 (2.6)                  | 25 (3.0)                    | 3 (1.2)                  |
| Factor V Leiden              | 39 (3.6)                  | 31 (3.7)                    | 8 (3.3)                  |
| Protein C deficiency         | 30 (2.8)                  | 26 (3.1)                    | 4 (1.6)                  |
| Protein S deficiency         | 130 (12.1)                | 94 (11.3)                   | 36 (14.8)                |
| Antithrombin III deficiency  | 56 (5.2)                  | 44 (5.3)                    | 12 (4.9)                 |
| Antiphospholipid syndrome    | 172 (16.0)                | 143 (17.1)                  | 29 (11.9)                |
| Lipoprotein (a)              | 103 (9.6)                 | 81 (9.7)                    | 22 (9.1)                 |
| Hyperhomocysteinemia         | 81 (7.5)                  | 58 (6.9)                    | 23 (9.5)                 |
| Device, n (%)                |                           |                             |                          |
| Amplatzer                    | 700 (64.9)                | 563 (67.4)                  | 137 (56.4)               |
| STARFlex                     | 225 (20.9)                | 175 (21.0)                  | 50 (20.6)                |
| HELEX                        | 100 (9.3)                 | 71 (8.5)                    | 29 (11.9)                |
| Sideris button               | 53 (4.9)                  | 26 (3.1)                    | 27 (11.1)                |

**Appendix Table 2.** The association of covariates with residual shunt and recurrent event.

| Covariates             | Residual shunt         |         | Recurrent stroke/TIA     |         |
|------------------------|------------------------|---------|--------------------------|---------|
|                        | Odds Ratio<br>(95% CI) | P Value | Hazard Ratio<br>(95% CI) | P Value |
| Study period           | 0.71 (0.56-0.91)       | 0.007   | 0.79 (0.44-1.40)         | 0.41    |
| Age                    | 1.00 (0.99-1.01)       | 0.71    | 1.01 (0.99-1.04)         | 0.21    |
| Gender                 | 0.81 (0.61-1.08)       | 0.153   | 1.54 (0.83-2.87)         | 0.174   |
| Device                 |                        |         |                          |         |
| Amplatzer*             | 1.00                   |         | 1.00                     |         |
| STARFlex               | 1.17 (0.81-1.69)       | 0.39    | 0.72 (0.31-1.68)         | 0.45    |
| HELEX                  | 1.68 (1.05-2.69)       | 0.031   | 1.84 (0.64-5.34)         | 0.26    |
| Sideris button         | 4.27 (2.41-7.55)       | <0.001  | 2.36 (1.00-5.59)         | 0.051   |
| Hypercoagulability     | 0.90 (0.67-1.20)       | 0.47    | 1.05 (0.57-1.94)         | 0.86    |
| Atrial septal aneurysm | 1.28 (0.94-1.75)       | 0.116   | 0.78 (0.38-1.59)         | 0.50    |
| Hypermobile septum     | 1.32 (0.95-1.83)       | 0.095   | 1.51 (0.81-2.83)         | 0.197   |
| Hypertension           | 0.84 (0.60-1.17)       | 0.30    | 1.56 (0.83-2.92)         | 0.171   |
| Hyperlipidemia         | 0.78 (0.56-1.08)       | 0.131   | 1.81 (0.99-3.32)         | 0.055   |
| Diabetes               | 1.23 (0.70-2.19)       | 0.47    | 2.75 (1.16-6.54)         | 0.022   |
| Aspirin                | 1.63 (0.84-3.16)       | 0.145   | 1.66 (0.40-6.88)         | 0.48    |
| Clopidogrel            | 0.72 (0.42-1.24)       | 0.24    | 1.83 (0.81-4.12)         | 0.145   |
| Warfarin               | 0.97 (0.78-1.22)       | 0.82    | 0.85 (0.52-1.39)         | 0.51    |

\* Reference category.

**Appendix Table 3.** Sensitivity analysis for differential follow-up

| Outcomes*                     | Original analysis        |         | Sensitivity analysis‡    |         |
|-------------------------------|--------------------------|---------|--------------------------|---------|
|                               | Hazard Ratio<br>(95% CI) | P Value | Hazard Ratio<br>(95% CI) | P Value |
| Recurrent ischemic stroke/TIA | 3.05 (1.65-5.62)         | <0.001  | 2.53 (1.37-4.67)         | 0.003   |
| Ischemic stroke               | 3.16 (1.38-7.21)         | 0.006   | 2.57 (1.12-5.87)         | 0.025   |
| Cryptogenic†                  | 9.62 (2.48-37.27)        | 0.001   | 8.02 (2.07-31.04)        | 0.003   |
| Non-cryptogenic†              | 1.23 (0.34-4.47)         | 0.75    | 0.98 (0.27-3.55)         | 0.97    |
| Transient ischemic attack     | 2.92 (1.17-7.25)         | 0.021   | 2.49 (1.00-6.20)         | 0.049   |

CI = confidence interval; TIA = transient ischemic attack.

\* Outcomes are the first event occurred in the patients post PFO closure.

† Recurrent ischemic strokes were adjudicated as “cryptogenic” and “non-cryptogenic” according to TOAST criteria.

‡ Sensitivity analysis was performed by simulating an additional event-free year for patients lost to follow-up in shunt group.



**Appendix Table 4.** Residual shunt rate over time.

| <b>Shunt size</b>    | <b>24 hr</b> | <b>1 m</b> | <b>6 m</b> | <b>1 yr</b> | <b>2 yr</b> | <b>3 yr</b> | <b>4 yr</b> | <b>5 yr</b> |
|----------------------|--------------|------------|------------|-------------|-------------|-------------|-------------|-------------|
| No shunt             | 53.5%        | 64.0%      | 70.5%      | 80.2%       | 83.0%       | 86.4%       | 88.5%       | 88.9%       |
| Small shunt          | 31.4%        | 24.8%      | 21.2%      | 12.6%       | 11.7%       | 8.4%        | 6.3%        | 6.3%        |
| Moderate/large shunt | 15.0%        | 11.1%      | 8.3%       | 7.2%        | 5.4%        | 5.2%        | 5.2%        | 4.8%        |

**Appendix Table 5.** Residual shunt and recurrent event by study period.

| Study period | Total number of patients | No shunt, n (%) | Shunt, n (%) |                      | Events | Event rate per 100 patient-years |
|--------------|--------------------------|-----------------|--------------|----------------------|--------|----------------------------------|
|              |                          |                 | Small shunt  | Moderate/large shunt |        |                                  |
| 1995~2002    | 134                      | 87 (64.9)       | 32 (23.9)    | 15 (11.2)            | 9      | 1.38                             |
| 2003~2010    | 696                      | 551 (79.2)      | 83 (11.9)    | 62 (8.9)             | 29     | 1.02                             |
| 2011~2017    | 248                      | 197 (79.4)      | 35 (14.1)    | 16 (6.5)             | 4      | 0.79                             |

**Appendix Table 6.** Primary and secondary outcomes by shunt size.

| Shunt size                                                                         | Outcomes |                                  | Unadjusted            |         | Adjusted <sup>‡</sup> |         |
|------------------------------------------------------------------------------------|----------|----------------------------------|-----------------------|---------|-----------------------|---------|
|                                                                                    | Events   | Event rate per 100 patient-years | Hazard Ratio (95% CI) | P Value | Hazard Ratio (95% CI) | P Value |
| <b><i>Primary outcome (the composite of recurrent ischemic stroke and TIA)</i></b> |          |                                  |                       |         |                       |         |
| Overall                                                                            | 42       | 1.05                             | 2.11 (1.48-3.01)      | <0.001  | 2.06 (1.43-2.96)      | <0.001  |
| No shunt*                                                                          | 24       | 0.75                             | 1.00                  |         | 1.00                  |         |
| Small shunt                                                                        | 7        | 1.52                             | 2.02 (0.87-4.69)      | 0.102   | 1.90 (0.80-4.49)      | 0.146   |
| Moderate/large shunt                                                               | 11       | 3.49                             | 4.50 (2.20-9.20)      | <0.001  | 4.28 (2.07-8.88)      | <0.001  |
| <b><i>Ischemic stroke</i></b>                                                      |          |                                  |                       |         |                       |         |
| Overall                                                                            | 23       | 0.58                             | 2.28 (1.43-3.66)      | <0.001  | 2.23 (1.37-3.62)      | 0.001   |
| No shunt*                                                                          | 13       | 0.40                             | 1.00                  |         | 1.00                  |         |
| Small shunt                                                                        | 3        | 0.65                             | 1.60 (0.46-5.62)      | 0.46    | 1.49 (0.41-5.38)      | 0.54    |
| Moderate/large shunt                                                               | 7        | 2.22                             | 5.42 (2.16-13.6)      | <0.001  | 5.12 (2.00-13.15)     | <0.001  |
| <b><i>Cryptogenic stroke<sup>†</sup></i></b>                                       |          |                                  |                       |         |                       |         |
| Overall                                                                            | 10       | 0.25                             | 4.15 (2.05-8.40)      | <0.001  | 4.26 (2.09-8.72)      | <0.001  |
| No shunt*                                                                          | 3        | 0.09                             | 1.00                  |         | 1.00                  |         |
| Small shunt                                                                        | 2        | 0.44                             | 4.54 (0.76-27.20)     | 0.098   | 4.82 (0.79-29.55)     | 0.089   |
| Moderate/large shunt                                                               | 5        | 1.59                             | 17.39 (4.15-72.80)    | <0.001  | 18.42 (4.28-79.17)    | <0.001  |
| <b><i>Non-cryptogenic stroke<sup>†</sup></i></b>                                   |          |                                  |                       |         |                       |         |
| Overall                                                                            | 13       | 0.33                             | 1.29 (0.59-2.80)      | 0.53    | 1.16 (0.51-2.63)      | 0.72    |
| No shunt*                                                                          | 10       | 0.31                             | 1.00                  |         | 1.00                  |         |
| Small shunt                                                                        | 1        | 0.22                             | 0.70 (0.09-5.51)      | 0.74    | 0.56 (0.07-4.56)      | 0.58    |
| Moderate/large shunt                                                               | 2        | 0.63                             | 1.96 (0.43-8.95)      | 0.39    | 1.63 (0.34-7.76)      | 0.54    |
| <b><i>Transient ischemic attack</i></b>                                            |          |                                  |                       |         |                       |         |
| Overall                                                                            | 19       | 0.48                             | 1.92 (1.12-3.29)      | 0.018   | 1.87 (1.08-3.25)      | 0.027   |
| No shunt*                                                                          | 11       | 0.34                             | 1.00                  |         | 1.00                  |         |
| Small shunt                                                                        | 4        | 0.87                             | 2.51 (0.80-7.90)      | 0.115   | 2.38 (0.73-7.71)      | 0.149   |
| Moderate/large shunt                                                               | 4        | 1.27                             | 3.47 (1.10-10.90)     | 0.033   | 3.33 (1.04-10.64)     | 0.043   |

CI = confidence interval; TIA = transient ischemic attack

\* Reference category.

† Recurrent ischemic strokes were adjudicated as “cryptogenic” and “non-cryptogenic” according to TOAST criteria.

‡ All values were adjusted for age, study period, device, the presence or absence of atrial septal aneurysm, hypertension, hyperlipidemia, diabetes, hypercoagulable status and hypermobile septum, as well as medication usage (aspirin, clopidogrel, warfarin) using propensity score method.

**Appendix Table 7.** Comparison between patients with small shunt and moderate/large shunt.

| <b>Characteristic</b>         | <b>Small shunt<br/>(n=150)</b> | <b>Moderate/large<br/>shunt (n=93)</b> | <b>Odds Ratio<br/>(95% CI)</b> | <b>P Value</b> |
|-------------------------------|--------------------------------|----------------------------------------|--------------------------------|----------------|
| Age, mean (SD), y             | 47.1 (13.6)                    | 52.2 (15.4)                            | 1.02 (1.01-1.04)               | 0.009          |
| Male sex, n (%)               | 75 (50.0)                      | 48 (51.6)                              | 1.07 (0.64-1.79)               | 0.81           |
| Hypercoagulability, n (%)     | 61 (40.7)                      | 40 (43.0)                              | 1.10 (0.65-1.86)               | 0.72           |
| Atrial septal aneurysm, n (%) | 38 (25.3)                      | 40 (43.0)                              | 2.22 (1.28-3.86)               | 0.004          |
| Hypermobility septum, n (%)   | 40 (26.7)                      | 27 (29.0)                              | 1.12 (0.63-2.00)               | 0.69           |
| Hypertension, n (%)           | 22 (14.7)                      | 36 (38.7)                              | 3.67 (1.99-6.80)               | <0.001         |
| Hyperlipidemia, n (%)         | 31 (20.7)                      | 31 (33.3)                              | 1.92 (1.07-3.44)               | 0.029          |
| Diabetes, n (%)               | 5 (3.3)                        | 12 (12.9)                              | 4.30 (1.46-12.63)              | 0.008          |
| Aspirin, n (%)                | 143 (95.3)                     | 89 (95.7)                              | 1.09 (0.31-3.83)               | 0.89           |
| Clopidogrel, n (%)            | 7 (4.7)                        | 10 (10.8)                              | 2.46 (0.90-6.71)               | 0.078          |
| Warfarin, n (%)               |                                |                                        | 1.22 (0.81-1.83)               | 0.35           |
| Short-term                    | 26 (17.3)                      | 19 (20.4)                              |                                |                |
| Long-term                     | 11 (7.3)                       | 9 (9.7)                                |                                |                |

SD = standard deviation; CI = confidence interval.

**Appendix Table 8.** Recurrent events over time.

|                 | 1 yr         | 2 yr       | 3 yr       | 4 yr        | 5 yr       | 6 yr        | 7 yr       | 8 yr       | 9 yr       | 10 yr      | 11 yr    | Total |
|-----------------|--------------|------------|------------|-------------|------------|-------------|------------|------------|------------|------------|----------|-------|
| Event,<br>n (%) | 11<br>(26.2) | 4<br>(9.5) | 4<br>(9.5) | 5<br>(11.9) | 3<br>(7.1) | 6<br>(14.3) | 4<br>(9.5) | 2<br>(4.8) | 1<br>(2.4) | 2<br>(4.8) | 0<br>(0) | 42    |
